# Supplementary material for: A multi-objective ensemble approach to hydrological modelling in the UK: an application to historic drought reconstruction
Source: Copernicus journal article supplement (doi:10.5194/hess-23-3247-2019), 2019-08-08
Supplement: Supplementary file 1 [file hess-23-3247-2019-supplement.pdf]

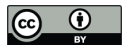

## *Supplement of*

# **A multi-objective ensemble approach to hydrological modelling in the UK: an application to historic drought reconstruction**

**Katie A. Smith et al.**

*Correspondence to:* Katie A Smith ([k.a.smith@ceh.ac.uk](mailto:k.a.smith@ceh.ac.uk))

The copyright of individual parts of the supplement might differ from the CC BY 4.0 License.

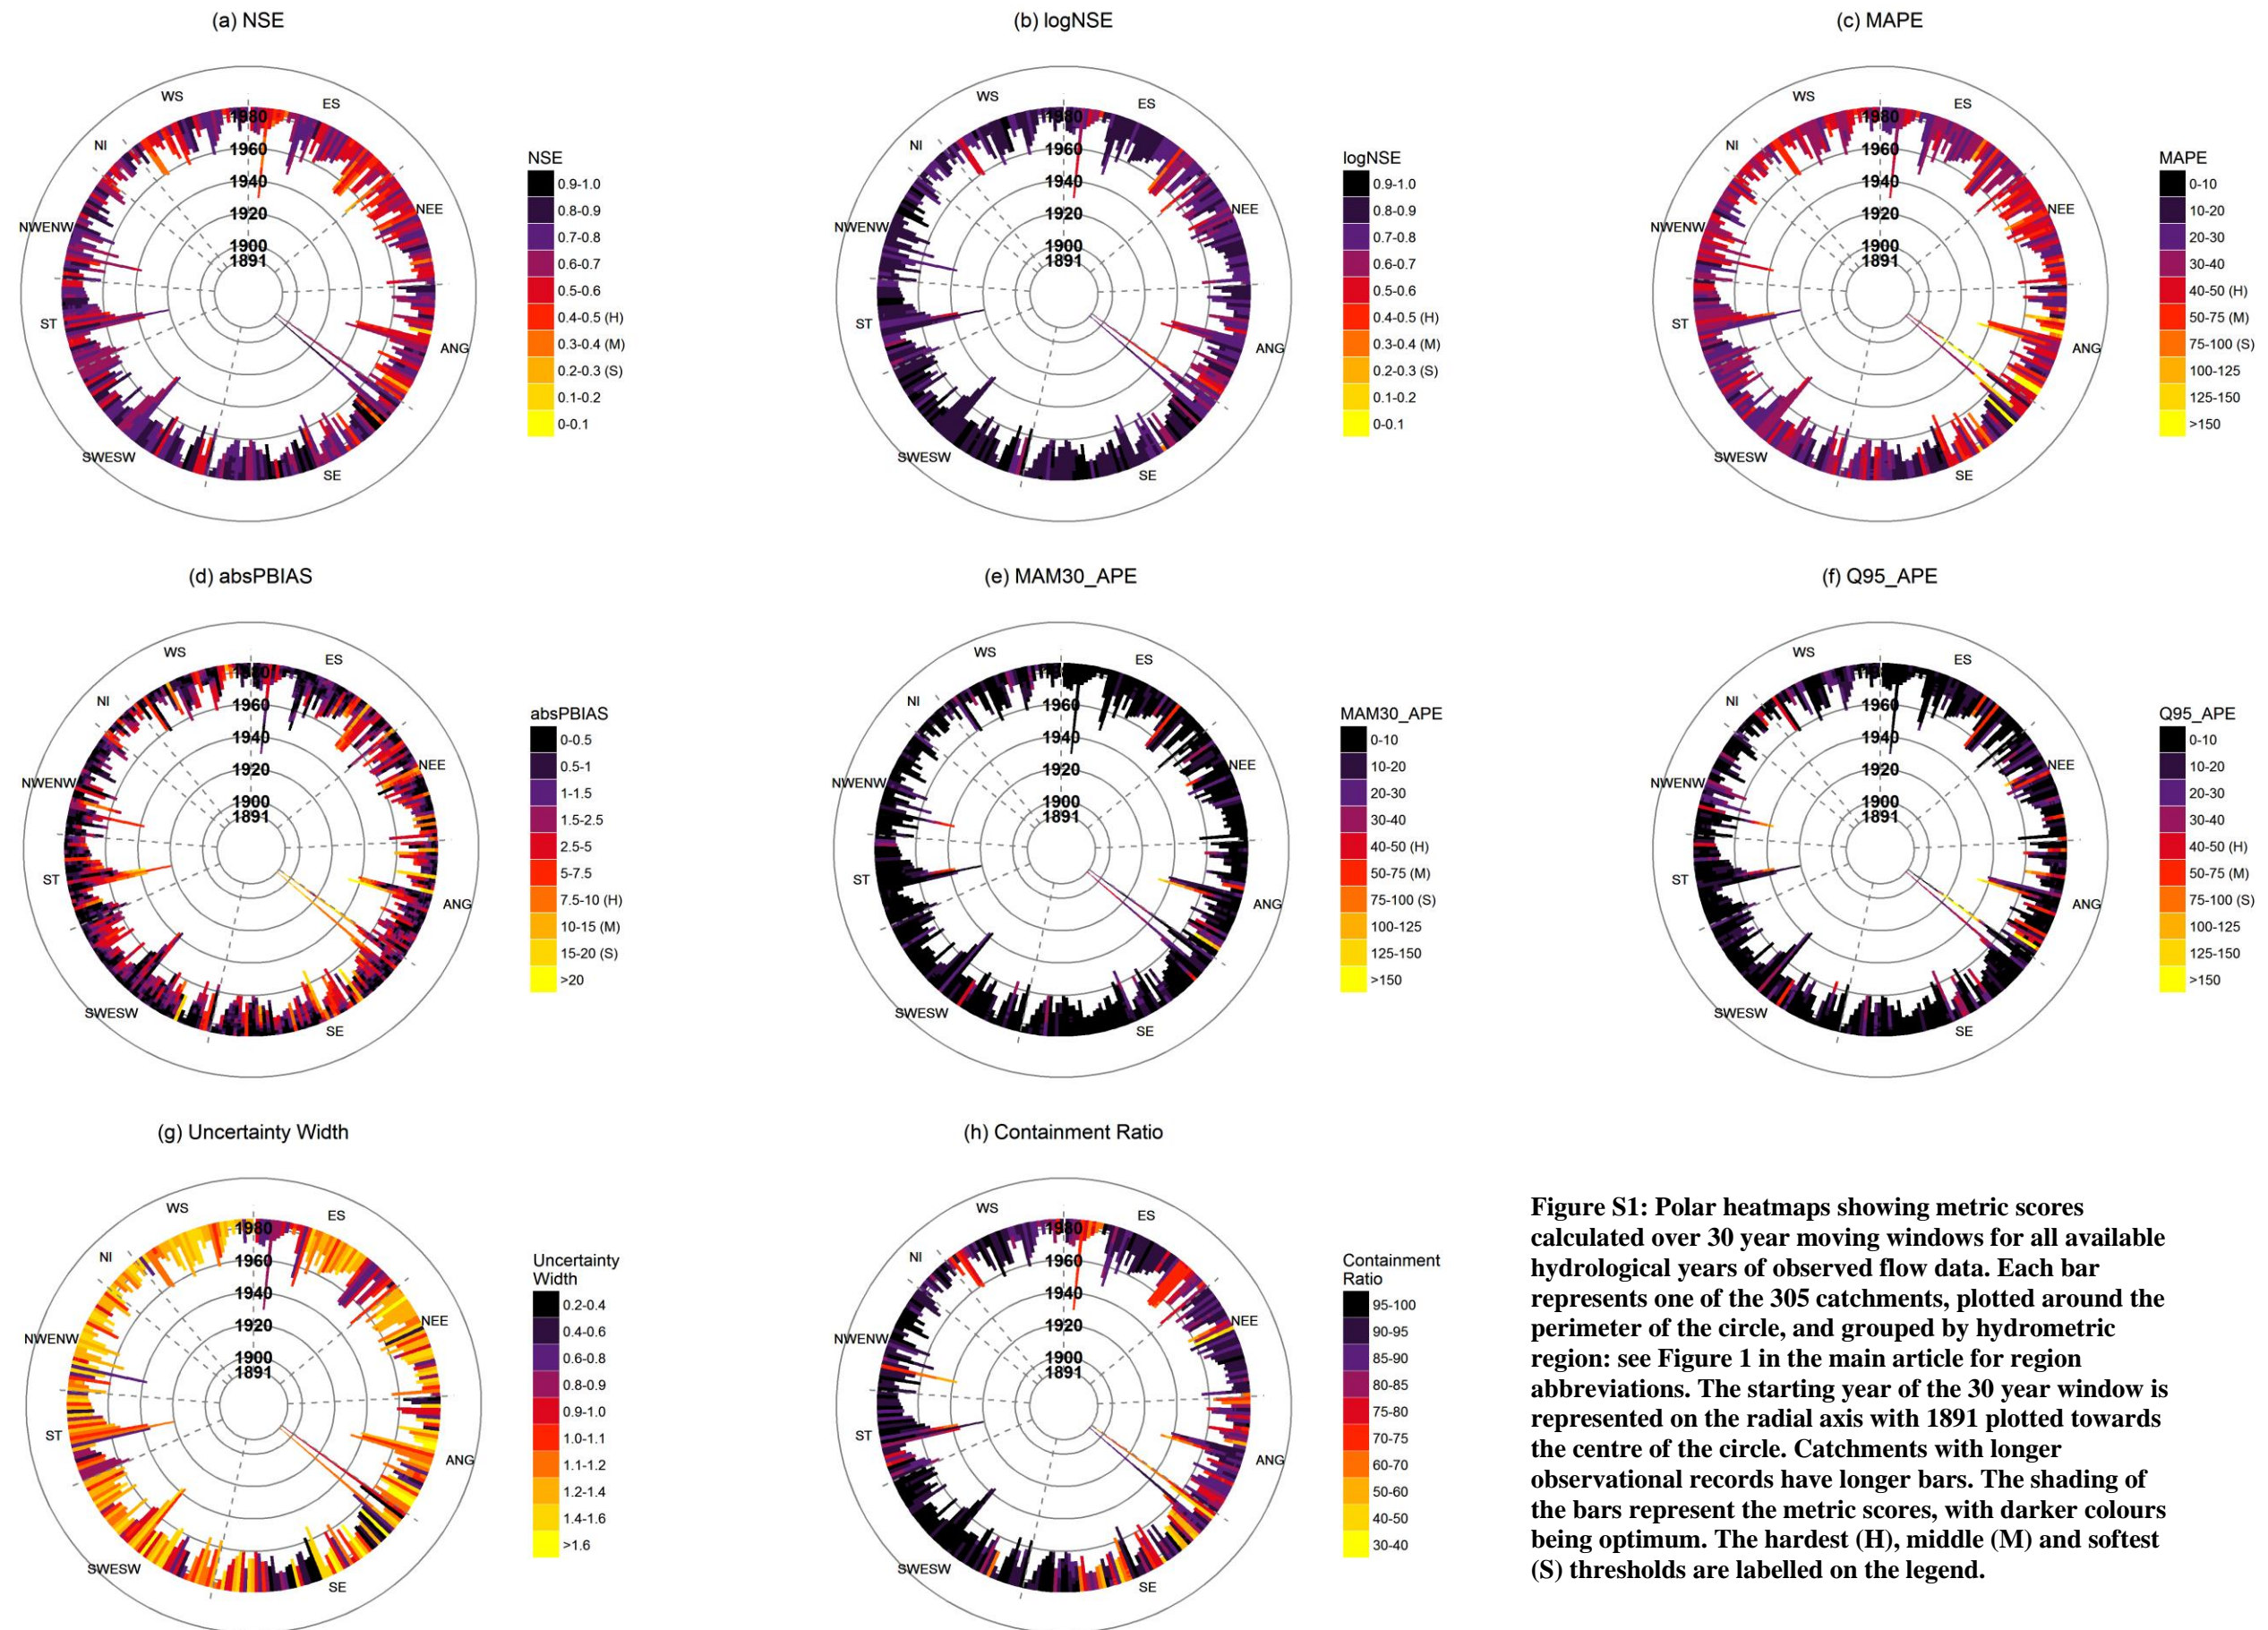

**Table S1: Summary statistics for the LHS1 runs for nine case study catchments. Evaluation metrics scores given in black are for the calibration period 1982-2014, those in red italics show the scores for the case study period 1971-1980, both using hydrological years.**

| catchid | River    | Area (sqkm) | Region | Obs Start | Threshold Met | NSE   |             | logNSE |             | MAPE  |              | absPBIAS |              | MAM30 <sub>APE</sub> |              | Q95 <sub>APE</sub> |              | Uncertainty Width |             | Containment Ratio |              |                  |
|---------|----------|-------------|--------|-----------|---------------|-------|-------------|--------|-------------|-------|--------------|----------|--------------|----------------------|--------------|--------------------|--------------|-------------------|-------------|-------------------|--------------|------------------|
|         |          |             |        |           |               | Calib | <i>CS</i>   | Calib  | <i>CS</i>   | Calib | <i>CS</i>    | Calib    | <i>CS</i>    | Calib                | <i>CS</i>    | Calib              | <i>CS</i>    | Calib             | <i>CS</i>   | Calib             | <i>CS</i>    | <i>SSI-12 CS</i> |
| 8004    | Avon     | 542.8       | ES     | 1952      | 2             | 0.40  | <i>0.21</i> | 0.43   | <i>0.34</i> | 51.67 | <i>56</i>    | 10.34    | <i>12</i>    | 59.04                | <i>48.1</i>  | 65.94              | <i>60.98</i> | 0.88              | <i>0.9</i>  | 73.21             | <i>73.42</i> | <i>55.83</i>     |
| 27051   | Crimple  | 8.1         | NEE    | 1972      | 2             | 0.52  | <i>0.44</i> | 0.76   | <i>0.77</i> | 73.71 | <i>60.97</i> | 9.00     | <i>14.28</i> | 0.31                 | <i>1.404</i> | 17.22              | <i>0</i>     | 1.51              | <i>1.52</i> | 86.20             | <i>86.41</i> | <i>53.75</i>     |
| 28072   | Greet    | 46.2        | ST     | 1974      | 1             | 0.50  | <i>0.63</i> | 0.74   | <i>0.79</i> | 26.59 | <i>25.61</i> | 0.54     | <i>3.018</i> | 7.53                 | <i>3.365</i> | 1.09               | <i>6.383</i> | 0.87              | <i>0.88</i> | 91.42             | <i>94.20</i> | <i>56.90</i>     |
| 33018   | Tove     | 138.1       | ANG    | 1962      | 1             | 0.65  | <i>0.62</i> | 0.81   | <i>0.87</i> | 36.84 | <i>27.62</i> | 1.12     | <i>10.07</i> | 6.21                 | <i>3.353</i> | 3.24               | <i>15.42</i> | 1.18              | <i>1.2</i>  | 88.44             | <i>92.83</i> | <i>50.00</i>     |
| 39019   | Lambourn | 234.1       | SE     | 1962      | 1             | 0.91  | <i>0.86</i> | 0.91   | <i>0.85</i> | 12.50 | <i>12.57</i> | 0.11     | <i>1.314</i> | 0.15                 | <i>9.399</i> | 1.42               | <i>12.12</i> | 0.22              | <i>0.23</i> | 48.08             | <i>51.93</i> | <i>25.83</i>     |
| 45005   | Otter    | 202.5       | SWESW  | 1963      | 1             | 0.52  | <i>0.49</i> | 0.68   | <i>0.69</i> | 40.45 | <i>39.8</i>  | 5.38     | <i>4.574</i> | 0.92                 | <i>0.012</i> | 0.61               | <i>12.35</i> | 1.03              | <i>1.04</i> | 90.30             | <i>91.71</i> | <i>68.33</i>     |
| 67018   | Dee      | 53.9        | NWENW  | 1969      | 1             | 0.79  | <i>0.73</i> | 0.84   | <i>0.84</i> | 47.97 | <i>44.8</i>  | 1.47     | <i>3.397</i> | 15.31                | <i>13.77</i> | 46.71              | <i>19.13</i> | 1.41              | <i>1.44</i> | 92.75             | <i>92.64</i> | <i>30.00</i>     |
| 81002   | Cree     | 368         | WS     | 1963      | 1             | 0.84  | <i>0.78</i> | 0.92   | <i>0.9</i>  | 27.37 | <i>31.2</i>  | 0.59     | <i>5.921</i> | 7.27                 | <i>16.06</i> | 6.83               | <i>6.025</i> | 1.43              | <i>1.46</i> | 92.68             | <i>91.73</i> | <i>36.67</i>     |
| 204001  | Bush     | 299.2       | NI     | 1972      | 1             | 0.67  | <i>0.67</i> | 0.76   | <i>0.74</i> | 37.48 | <i>50.82</i> | 0.85     | <i>7.728</i> | 2.90                 | <i>20.9</i>  | 0.49               | <i>46.55</i> | 1.10              | <i>1.11</i> | 91.29             | <i>87.13</i> | <i>46.48</i>     |



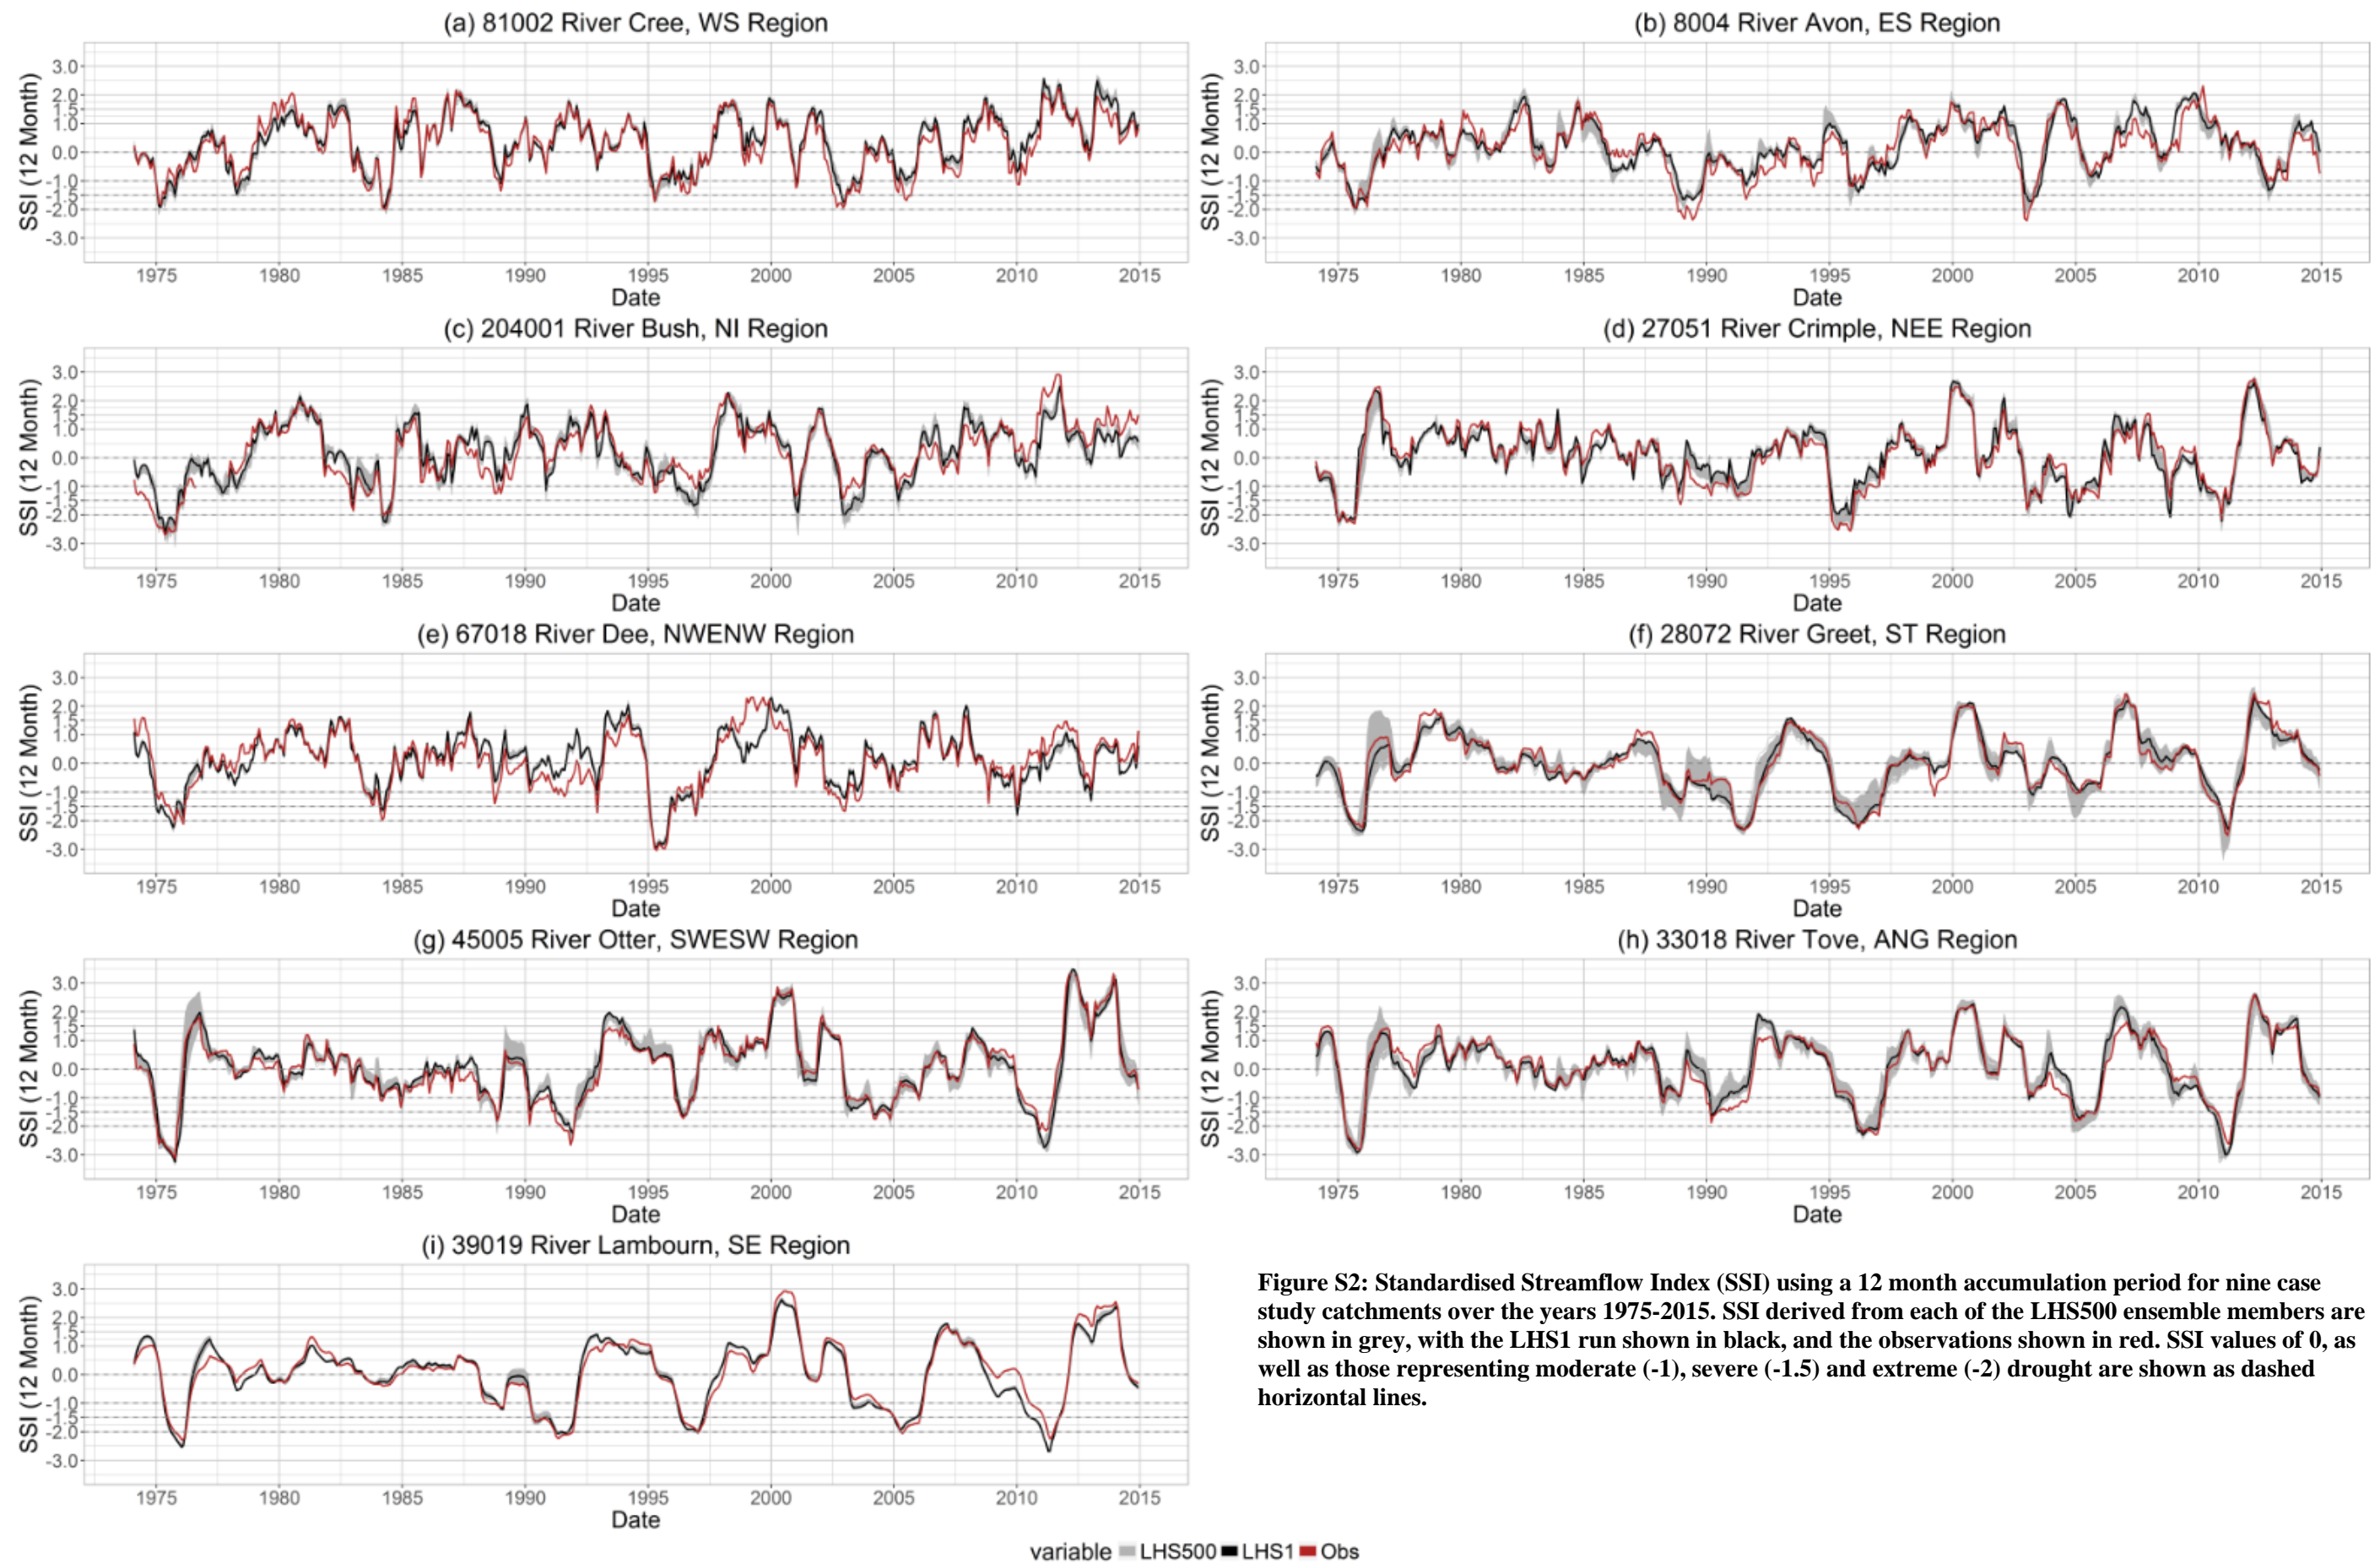

**Figure S2: Standardised Streamflow Index (SSI) using a 12 month accumulation period for nine case study catchments over the years 1975-2015. SSI derived from each of the LHS500 ensemble members are shown in grey, with the LHS1 run shown in black, and the observations shown in red. SSI values of 0, as well as those representing moderate (-1), severe (-1.5) and extreme (-2) drought are shown as dashed horizontal lines.**

**Table S2 Table of Acronyms used in the Manuscript**

| <b>Acronym</b>       | <b>Meaning</b>                                                                                   |
|----------------------|--------------------------------------------------------------------------------------------------|
| absPBIAS             | Absolute Percent Bias                                                                            |
| ANG                  | Anglian                                                                                          |
| ContR                | Containment Ratio                                                                                |
| EIDC                 | Environmental Information Data Centre                                                            |
| ES                   | East Scotland                                                                                    |
| GLUE                 | Generalised Likelihood Uncertainty Estimation                                                    |
| GR4J                 | Génie Rural à 4 paramètres Journalier                                                            |
| LHS                  | Latin Hypercube Sample                                                                           |
| LHS1                 | Run from the top model parameterisation, the “best” run                                          |
| LHS500               | Runs from the top 500 model parameterisations                                                    |
| logNSE               | Nash Sutcliffe Efficiency calculated on log transformed flows                                    |
| MAM30 <sub>APE</sub> | Absolute Percent Error in Mean Annual Minimum Flows (calculated on a 30 day accumulation period) |
| MAPE                 | Mean Absolute Percent Error                                                                      |
| NEE                  | North East England                                                                               |
| NI                   | Northern Ireland                                                                                 |
| NRFA                 | National River Flow Archive                                                                      |
| NSE                  | Nash Sutcliffe Efficiency                                                                        |
| NWENW                | North West England and North Wales                                                               |
| PEST                 | Parameter ESTimation                                                                             |
| PET                  | Potential Evapotranspiration                                                                     |
| Q95 <sub>APE</sub>   | Absolute Percent Error in the 95 <sup>th</sup> flow percentile                                   |
| SCE                  | Shuffled Complex Evolution                                                                       |
| SE                   | South England                                                                                    |
| SPI                  | Standardised Precipitation Index                                                                 |
| SSI                  | Standardised Streamflow Index                                                                    |
| SSI-12               | Standardised Streamflow Index calculated over a 12 month accumulation period                     |
| ST                   | Severn Trent                                                                                     |
| SWESW                | South West England and South Wales                                                               |
| UncW                 | Uncertainty Width                                                                                |
| WS                   | West Scotland                                                                                    |
